# Supplementary material for: Studies on the thermal behavior and safety of a novel thermostable explosive BPTAP
Source: Royal Society of Chemistry journal article supplement (doi:10.1039/c9ra03385h), 2019-01-01
Supplement: c9ra03385h1.pdf [file c9ra03385h1.pdf]

## Support information

### **Studies on the thermal behavior and safety of the novel thermostable explosive BPTAP**

Fang Yang <sup>\*a</sup>, Ya Chen <sup>a</sup>, Chuande Zhao <sup>\*a</sup>, Long Zhang <sup>a</sup>

<sup>a</sup> Institute of Chemical Materials, China Academy of Engineering Physics, Mianyang

Sichuan 621900, China

\*Corresponding Authors:

E-mail: [yangfang@caep.cn](mailto:yangfang@caep.cn) (F. Yang); [c.d.zhao@caep.cn](mailto:c.d.zhao@caep.cn) (C.D. Zhao)

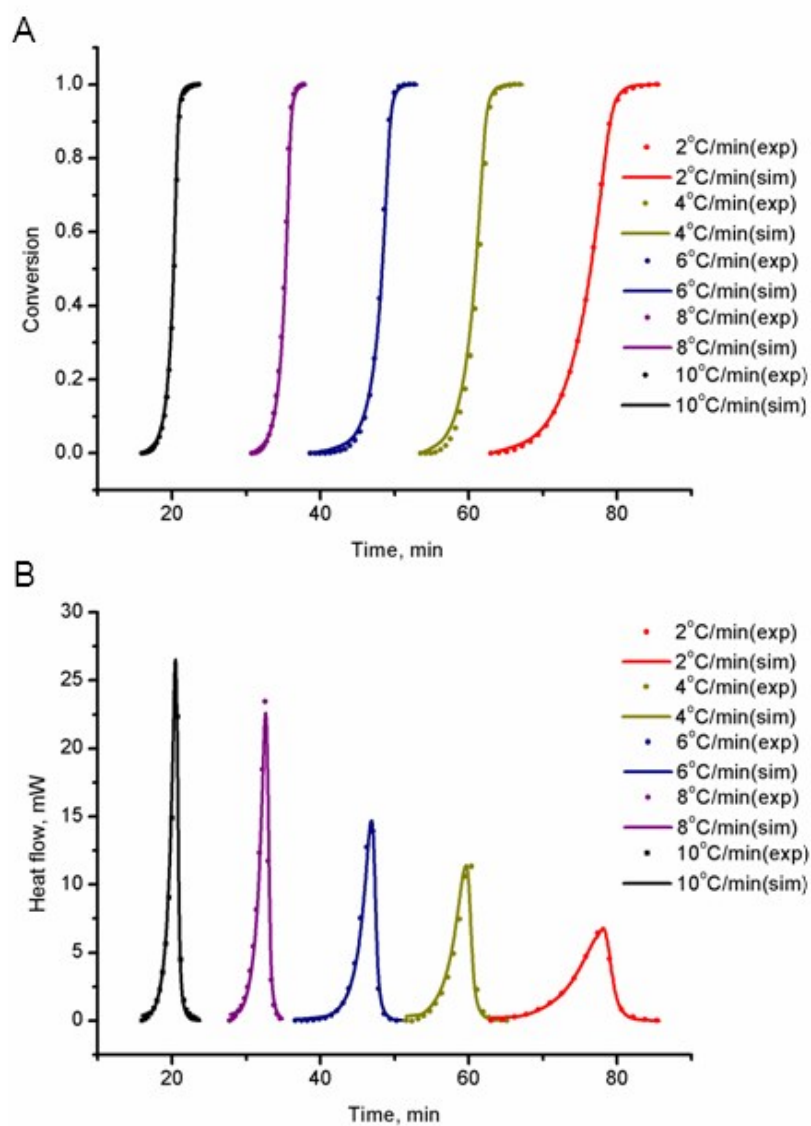

**Fig. S1.** Experimental and simulated conversion and heat production rate from the DSC data under the hermetic condition. (A) conversion vs time for BPTAP under different temperature rate; (B) heat production rate vs time for BPTAP under different temperature rate.

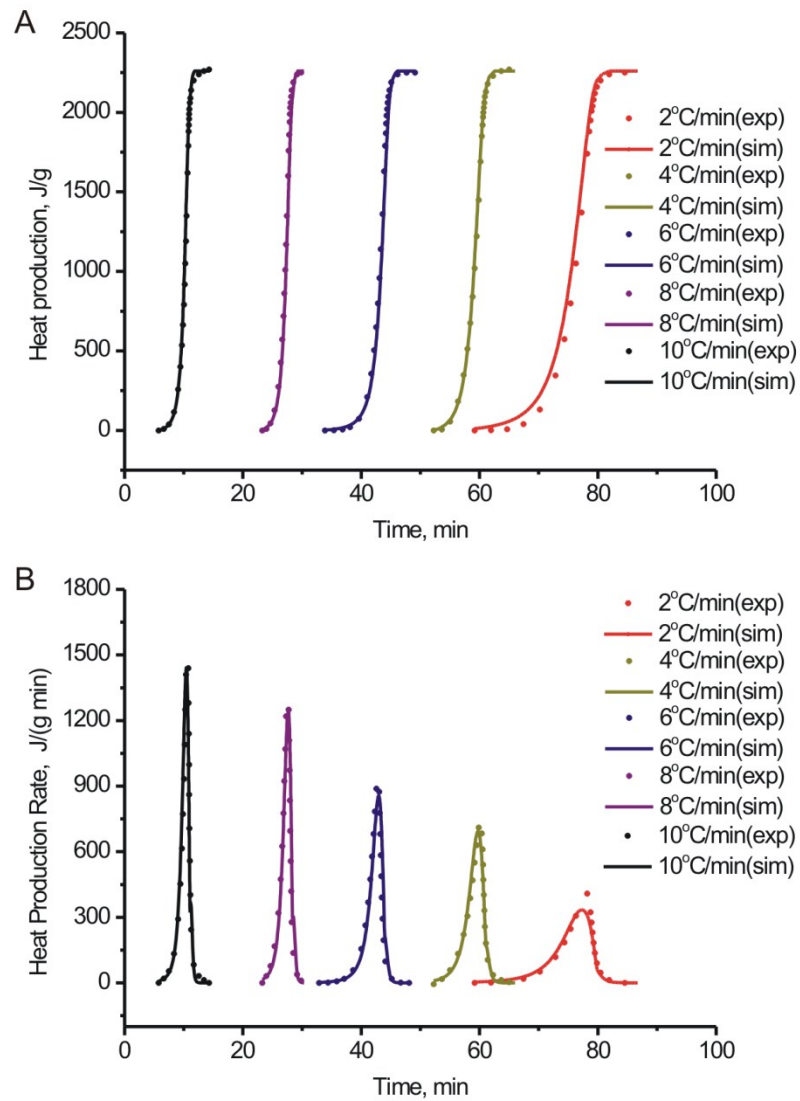

**Fig. S2.** Comparison between experiment tests in the non-hermetic vessel and simulation of: (A) heat production vs time for BPTAP; (B) heat production rate vs time for BPTAP.

**Table S1.** Kinetic parameters of the reaction model for BPTAP based on the kinetic model determined in the measurements taken in the hermetic vessel

| Parameters | Units          | Autocatalytic 1 | Autocatalytic 2 |
|------------|----------------|-----------------|-----------------|
| $\ln(A)$   | $\ln(s^{-1})$  | 25.83           | 27.97           |
| $E_a$      | $kJ\ mol^{-1}$ | 154.55          | 172.31          |
| $n_1$      | -              | 1.18            | 0.55            |
| $n_2$      | -              | 1.57            | 0.87            |
| $\ln(z_0)$ | -              | -5.07           | -3.75           |
| $E_z$      | $kJ\ mol^{-1}$ | 1.85            | 0.05            |
| $m$        | -              | 0.05            | 0.05            |
| $Q$        | $kJ\ kg^{-1}$  | 309.78          | 1952.41         |
